# Supplementary material for: p–d Orbital coupling in silicon-based dual-atom catalysts for enhanced CO2 reduction: insight into electron regulation of active center and coordination atoms
Source: Royal Society of Chemistry journal article supplement (doi:10.1039/d4ta06642a), 2024-01-01
Supplement: d4ta06642a1.pdf [file d4ta06642a1.pdf]

# Supplementary Information for p-d Orbital Coupling in Silicon-Based Dual-Atom Catalysts for Enhanced CO<sub>2</sub> Reduction: Insight into Electron Regulation of Active Center and Coordination Atoms

Meijie Wang,<sup>†</sup> Yaowei Xiang,<sup>†</sup> Yuxing Lin,<sup>†</sup> Yang Sun,<sup>†</sup> Zi-zhong Zhu,<sup>†</sup> Shunqing  
Wu,<sup>†</sup> and Xinrui Cao<sup>\*,†,‡</sup>

<sup>†</sup>*Department of Physics, Xiamen University, Xiamen 361005, China*

<sup>‡</sup>*Fujian Provincial Key Laboratory of Theoretical and Computational Chemistry, Xiamen  
University, Xiamen 361005, China*

E-mail: xinruicao@xmu.edu.cn

# Computational Details

The number of  $p_z$  electrons ( $N_{p_z}$ ) is estimated by the following equation:

$$N_{p_z} = \int_{-\infty}^0 D(E)dE \quad (1)$$

Considering that the transition metal  $d$  orbital is localized, whereas the Si  $p$  orbital is delocalized, we have set different intervals. The  $d$  band center ( $\varepsilon_d$ ) is estimated by the following equation:

$$\varepsilon_d = \frac{\int_{-6.4}^{+5.4} E \cdot D(E)dE}{\int_{-6.4}^{+5.4} D(E)dE} \quad (2)$$

The  $p_z$  band center ( $\varepsilon_{p_z}$ ) is estimated by the following equation:

$$\varepsilon_{p_z} = \frac{\int_{-\infty}^{+\infty} E \cdot D(E)dE}{\int_{-\infty}^{+\infty} D(E)dE} \quad (3)$$

Different structures have different energy intervals, so we normalize  $\varepsilon_{p_z}$  to obtain  $\varepsilon'_{p_z}$ :

$$\varepsilon'_{p_z} = \frac{1}{\int_{-\infty}^{+\infty} E dE} \cdot \varepsilon_{p_z} = \frac{\int_{-\infty}^{+\infty} E \cdot D(E)dE}{\int_{-\infty}^{+\infty} D(E)dE \cdot E dE} \quad (4)$$

where  $D(E)$  is the density of state (DOS) of the band at a given energy  $E$ . The Fermi level ( $E_F$ ) is calibrated to  $E_F = 0$ .

## Machine Learning

First, the subset consisting of 85 SiTMN<sub>5</sub>An structures with 24 different transition metals across 12 coordination environments was employed to train for predicting  $\Delta G^*_{\text{CO}_2}$  and  $\Delta G^*_{\text{OH}}$ . The distribution of  $\Delta G^*_{\text{CO}_2}$  and  $\Delta G^*_{\text{OH}}$  of SiTMN<sub>5</sub>An DACs in the DFT calculated database of this work is plotted in Figure S1(a)(b), respectively. The  $\Delta G^*_{\text{CO}_2}$  ranges from -1.94 to 0.24 eV, while  $\Delta G^*_{\text{OH}}$  ranges from -2.00 to -0.65 eV. The  $\Delta G^*_{\text{CO}_2}$  and  $\Delta G^*_{\text{OH}}$  values are distributed in a wide range, which is beneficial for the machine learning model to learn

the relationship between the structure and adsorption free energy.

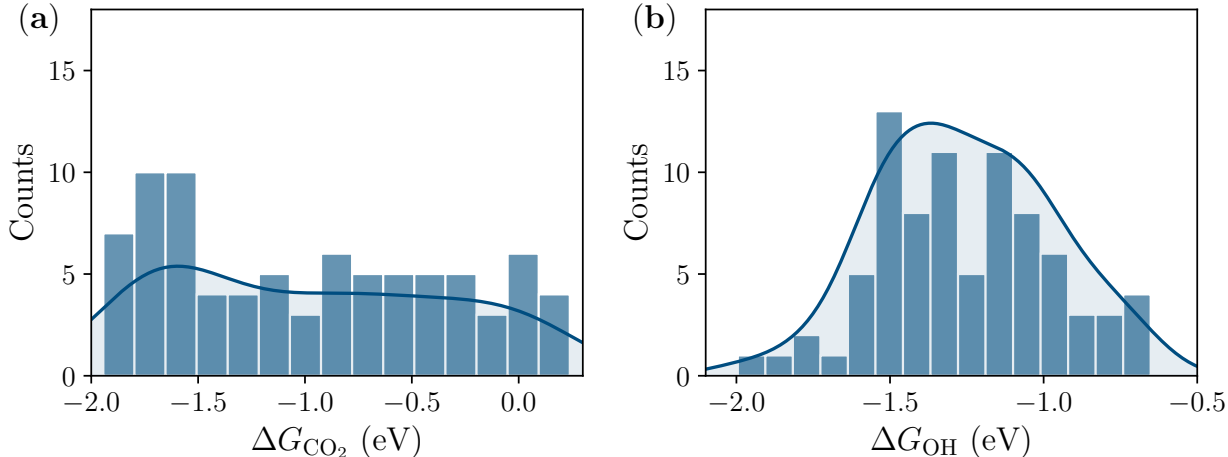

Figure S1: Histogram of (a)  $\Delta G^*_{\text{CO}_2}$  and (b)  $\Delta G^*_{\text{OH}}$  in the DFT calculated database of SiTMN<sub>5</sub>An DACs, respectively.

Our primary target was the adsorption free energy ( $\Delta G$ ) on SiTMN<sub>5</sub>An DACs. To predict  $\Delta G$ , we incorporated 22 input features relating to the structure and various atomic properties that may influence adsorption free energy. These features included 14 attributes pertaining to transition metals and 8 derived from one-hot encoding of coordination environments, as detailed in Table S1.

Table S1: 22 Initial Features with their Description

| Features | Description           | Features | Description                   |
|----------|-----------------------|----------|-------------------------------|
| $N$      | Atomic number         | $C$      | Atomic cycle                  |
| $G$      | Atomic group          | $M$      | Atomic weight                 |
| $R$      | Atomic radii          | $\alpha$ | Polarizability                |
| $E_A$    | Electron affinity     | $\chi$   | Electronegativity             |
| $E_l$    | Ionization energy     | $N_l$    | Number of lone pair electrons |
| $N_s$    | Number of s electrons | $N_p$    | Number of p electrons         |
| $N_d$    | Number of d electrons | $N_V$    | Number of valence electrons   |
| $D_B$    | Doping with B atom    | $D_C$    | Doping with C atom            |
| $P_1$    | Doping of position 1  | $P_2$    | Doping of position 2          |
| $P_3$    | Doping of position 3  | $P_4$    | Doping of position 4          |
| $P_5$    | Doping of position 4  | $P_6$    | Doping of position 6          |

To refine our feature set, we first analyzed the Pearson correlation coefficients among

the 14 non-coordination features, as shown in Figure S2. We identified and removed five redundant features ( $N$ ,  $C$ ,  $G$ ,  $\alpha$  and  $N_p$ ) that exhibited correlations exceeding 0.8, reducing the feature count to 17. The Recursive Feature Elimination<sup>1</sup> (RFE) method, supported by the Gradient Boosting Regression (GBR) algorithm, was then employed to further minimize the feature set. Root mean squared error (RMSE) and determination coefficient ( $R^2$ ), averaged from 10 training runs, guided the iterative removal of features, a process depicted in Figure S3.

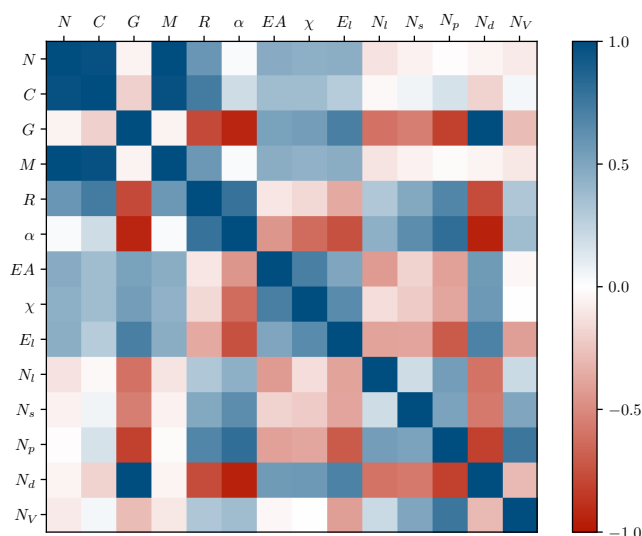

Figure S2: The Pearson correlation coefficients of the 14 features about transition metal atoms.

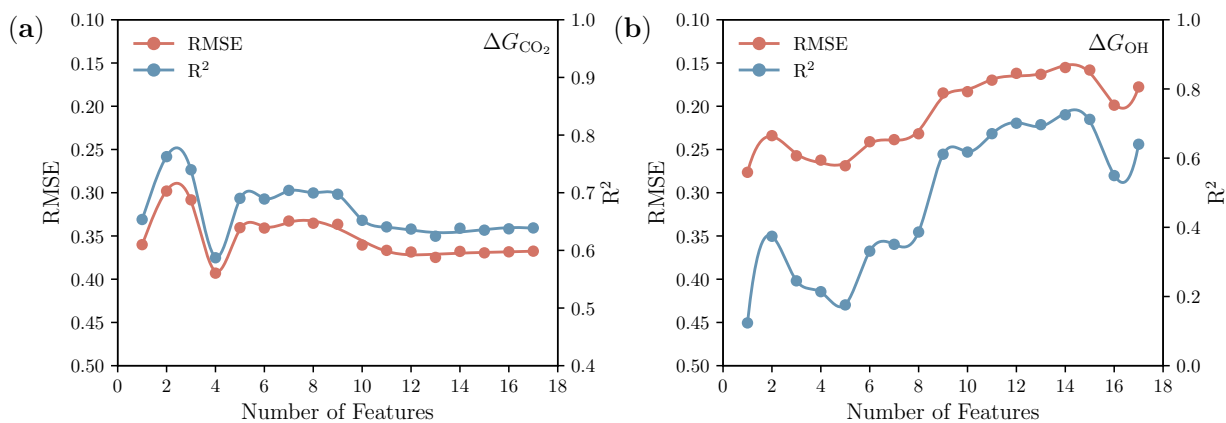

Figure S3: Extraction of important features by RFE for (a)  $\Delta G^*_{CO_2}$  and (b)  $\Delta G^*_{OH}$ .

Combining the results of RFE and considering the interpretability and accuracy of the

model, ultimately, the features  $N_d$ ,  $R$ , and eight coordination-related features were selected for the final model, as listed in Table S2. These features did not require additional density functional theory (DFT) calculations, thereby facilitating the exploration of a broader chemical space.

Table S2: 10 Features Used in the Final Model in Predicting  $\Delta G^*_{\text{CO}_2}$  and  $\Delta G^*_{\text{OH}}$

| Features | Description           | Features | Description          |
|----------|-----------------------|----------|----------------------|
| $N_d$    | Number of d electrons | $R$      | Atomic radii         |
| $D_B$    | Doping with B atom    | $D_C$    | Doping with C atom   |
| $P_1$    | Doping of position 1  | $P_2$    | Doping of position 2 |
| $P_3$    | Doping of position 3  | $P_4$    | Doping of position 4 |
| $P_5$    | Doping of position 4  | $P_6$    | Doping of position 6 |

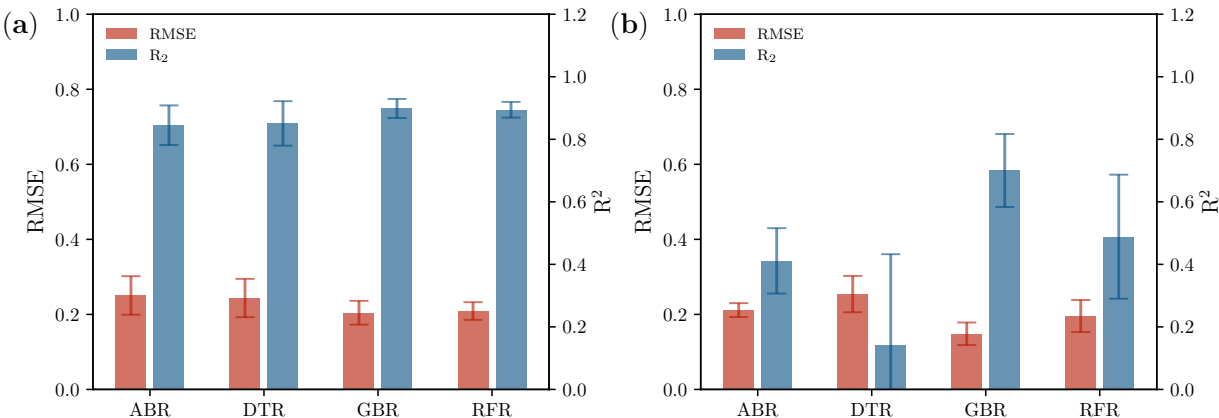

Figure S4: Performance of the models constructed through different algorithms: ABR, DTR, GBR and RFR in predicting (a)  $\Delta G^*_{\text{CO}_2}$  and (b)  $\Delta G^*_{\text{OH}}$ .

In terms of machine learning models, we evaluated four regression algorithms from the scikit-learn<sup>1</sup> library: Adaptive Boosting Regressor (ABR), Decision Tree Regressor (DTR), Gradient Boosted Regression (GBR) and Random Forest Regressor (RFR). These models were assessed based on their RMSE and  $R^2$ , with results showcased in Figure S4. A fivefold cross-validation on the training dataset was conducted to fine-tune the hyperparameters. Although most models performed adequately for predicting  $\Delta G^*_{\text{CO}_2}$ , only the GBR model demonstrated robust performance for  $\Delta G^*_{\text{OH}}$ , making it the preferred choice for subsequent ML modeling.

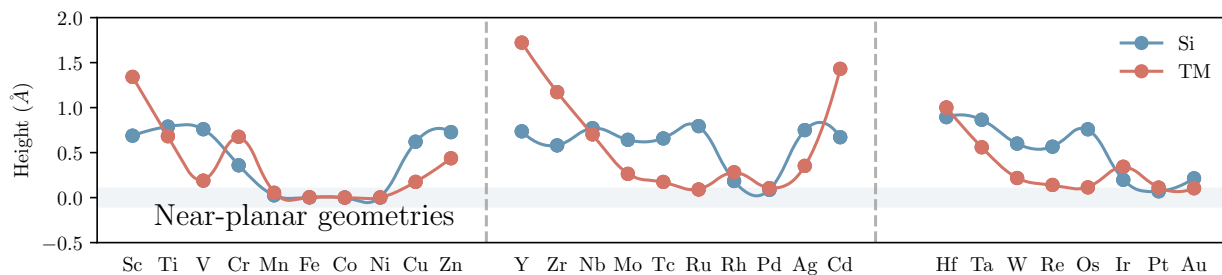

Figure S5: The height of Si and TM atoms away from the graphene plane in different SiTMN<sub>6</sub> DACs.

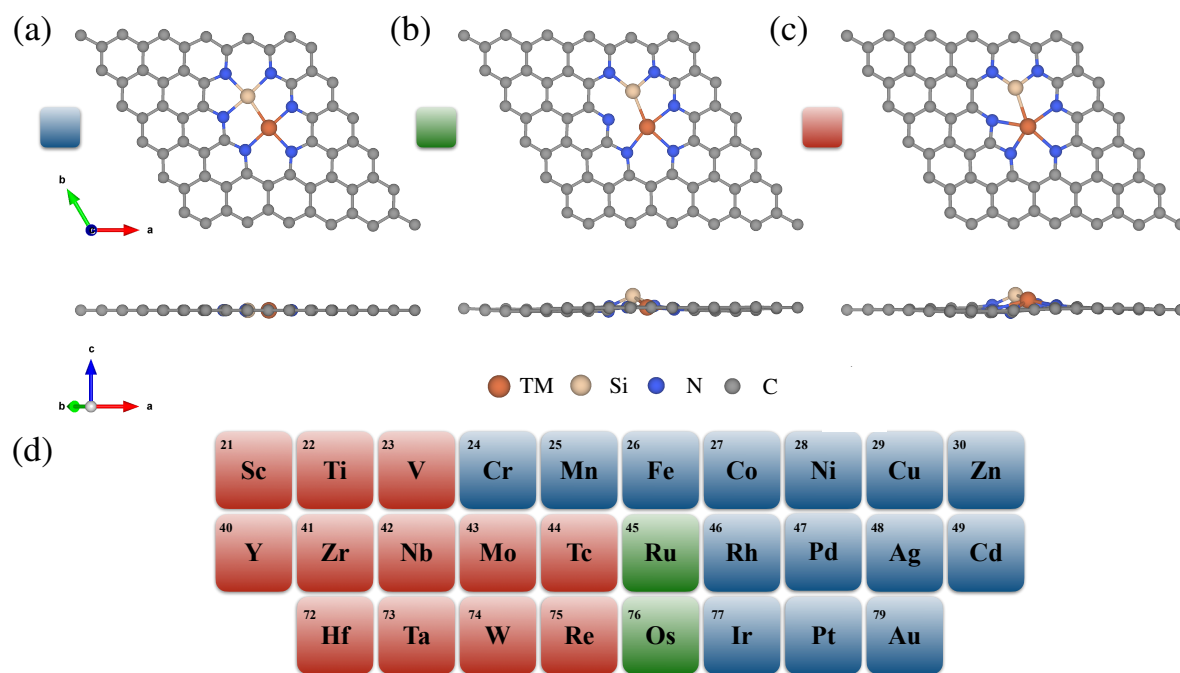

Figure S6: Three possible SiTMN<sub>6</sub> DACs structures. And distribution heatmap of different structures.

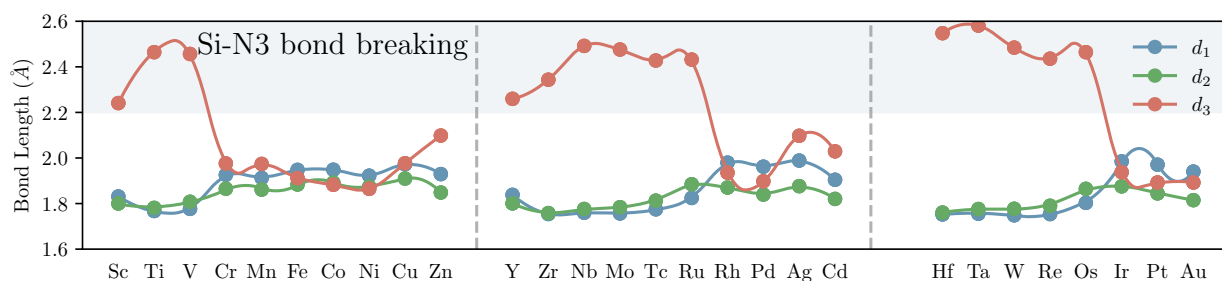

Figure S7: The bond length between Si atoms and N atoms on different SiTMN<sub>6</sub> DACs.

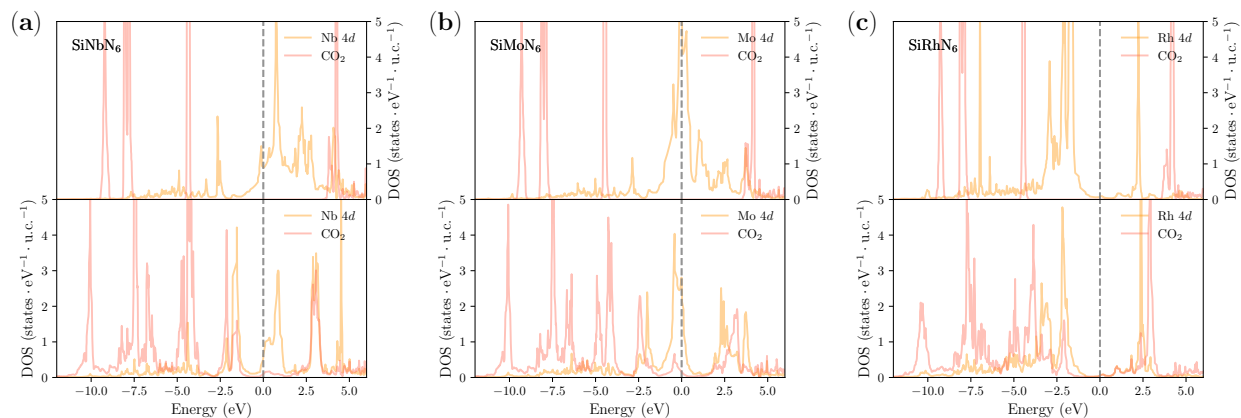

Figure S8: Before and after adsorption, the partial density of states (PDOS) for the TM  $d$  and  $\text{CO}_2$  orbitals of  $\text{SiNbN}_6$ ,  $\text{SiMoN}_6$  and  $\text{SiRhN}_6$  DACs, respectively. The top image represents the state before adsorption, while the bottom image shows the state after adsorption.

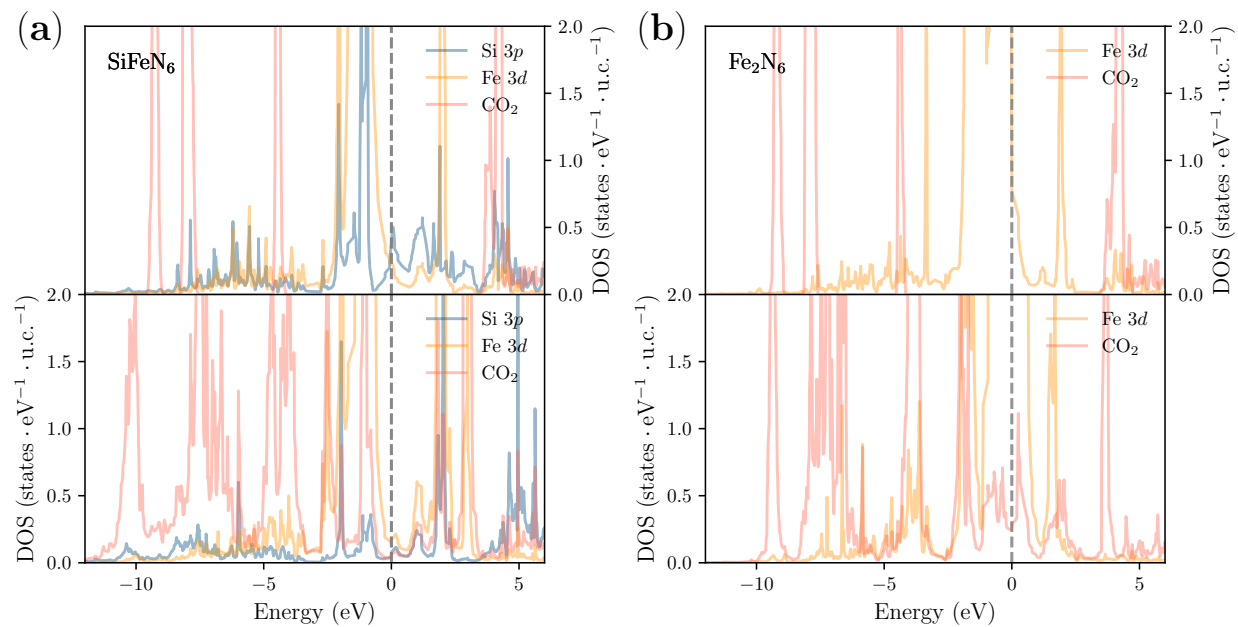

Figure S9: Before and after adsorption, the PDOS for the Si  $3p$ , Fe  $3d$  and  $\text{CO}_2$  orbitals of  $\text{SiFeN}_6$  and  $\text{Fe}_2\text{N}_6$  DACs, respectively. The top image represents the state before adsorption, while the bottom image shows the state after adsorption.

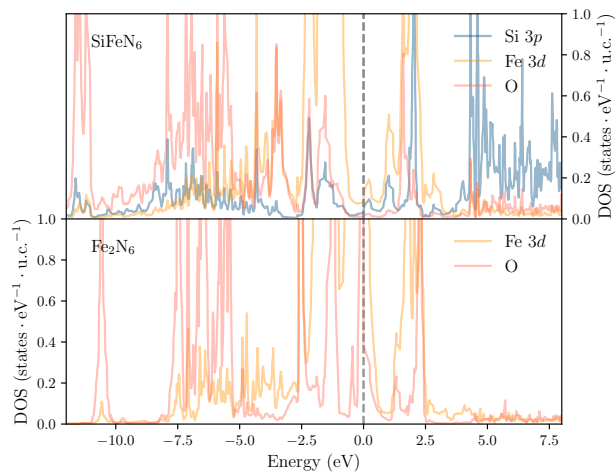

Figure S10: The PDOS for the Si  $3p$ , Fe  $3d$  and O in  $^*CHO$  on SiFeN<sub>6</sub> DACs. And the PDOS for the Fe  $3d$  and O in  $^*CHO$  on Fe<sub>2</sub>N<sub>6</sub> DACs.



Table S3:  $\Delta G_{\max}$  of 27 SiTMN<sub>6</sub> DACs, Product and Potential-determining Step.

| Group | TM | $\Delta G_{\max}$ | Product            | Potential-determining Step                               |
|-------|----|-------------------|--------------------|----------------------------------------------------------|
| IIIB  | Sc | 0.33              | CH <sub>4</sub>    | *OH →* H <sub>2</sub> O                                  |
|       | Y  | 0.26              | CH <sub>4</sub>    | *OH →* H <sub>2</sub> O                                  |
| IVB   | Ti | 0.41              | CH <sub>4</sub>    | *OH →* H <sub>2</sub> O                                  |
|       | Zr | 0.43              | CH <sub>4</sub>    | *OH →* H <sub>2</sub> O                                  |
|       | Hf | 0.44              | CH <sub>4</sub>    | *OH →* H <sub>2</sub> O                                  |
| VB    | V  | 0.49              | CH <sub>4</sub>    | *OH →* H <sub>2</sub> O                                  |
|       | Nb | 0.46              | CH <sub>4</sub>    | *OH →* H <sub>2</sub> O                                  |
|       | Ta | 0.55              | CH <sub>4</sub>    | *OH →* H <sub>2</sub> O                                  |
| VIB   | Cr | 0.53              | CH <sub>4</sub>    | *OH →* H <sub>2</sub> O                                  |
|       | Mo | 0.50              | CH <sub>4</sub>    | *OH →* H <sub>2</sub> O                                  |
|       | W  | 0.50              | CH <sub>4</sub>    | *OH →* H <sub>2</sub> O                                  |
| VIIB  | Mn | 0.33              | CH <sub>4</sub>    | *OH →* H <sub>2</sub> O                                  |
|       | Tc | 0.59              | CH <sub>4</sub>    | *CO +* OH →* CO +* H <sub>2</sub> O                      |
|       | Re | 0.58              | CH <sub>4</sub>    | *CO +* OH →* CO +* H <sub>2</sub> O                      |
|       | Fe | 0.28              | CH <sub>4</sub>    | *OH →* H <sub>2</sub> O                                  |
|       | Ru | 0.53              | CH <sub>4</sub>    | *OH →* H <sub>2</sub> O                                  |
|       | Os | 0.52              | CH <sub>4</sub>    | *OH →* H <sub>2</sub> O                                  |
| VIII  | Co | 0.17              | CH <sub>3</sub> OH | *OH →* H <sub>2</sub> O                                  |
|       | Rh | 0.13              | CH <sub>3</sub> OH | *OH →* H <sub>2</sub> O                                  |
|       | Ir | 0.08              | CH <sub>4</sub>    | *OH →* H <sub>2</sub> O                                  |
|       | Ni | 0.26              | CH <sub>4</sub>    | *OH →* H <sub>2</sub> O                                  |
|       | Pd | 0.22              | CH <sub>4</sub>    | *OH →* H <sub>2</sub> O                                  |
|       | Pt | 0.18              | CH <sub>4</sub>    | *OCH <sub>2</sub> OH →* OCH <sub>2</sub> OH <sub>2</sub> |
| IB    | Cu | 0.54              | CH <sub>4</sub>    | *OH →* H <sub>2</sub> O                                  |
|       | Ag | 0.52              | CH <sub>4</sub>    | *OH →* H <sub>2</sub> O                                  |
| IIB   | Zn | 0.23              | CH <sub>4</sub>    | *OH →* H <sub>2</sub> O                                  |
|       | Cd | 0.32              | CH <sub>4</sub>    | *OH →* H <sub>2</sub> O                                  |

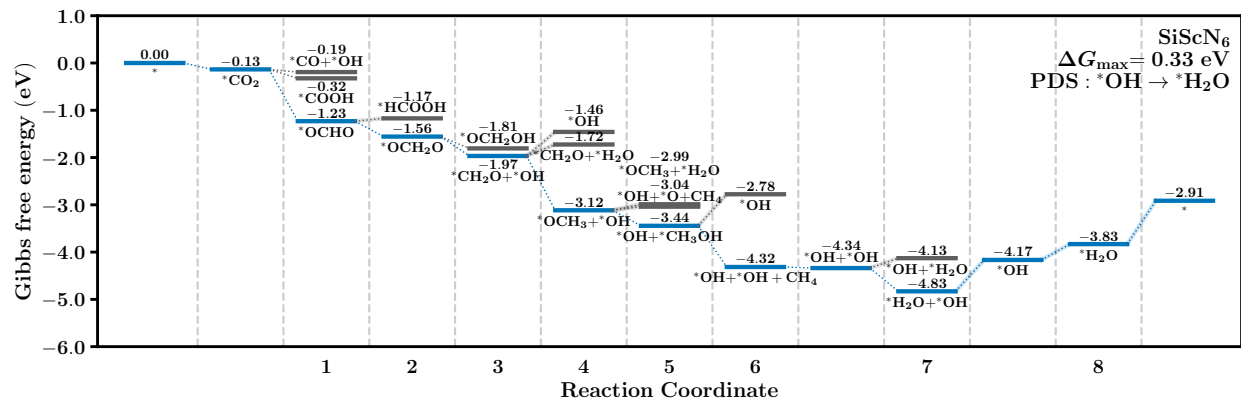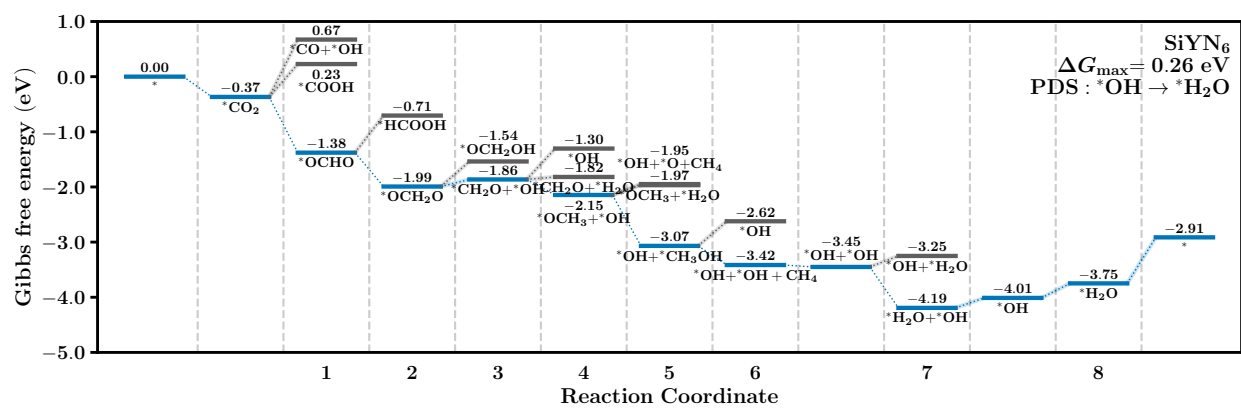

Figure S11: The relative Gibbs free energies in CO<sub>2</sub>RR on SiScN<sub>6</sub> and SiYN<sub>6</sub> DACs under the applied potential of 0 V.

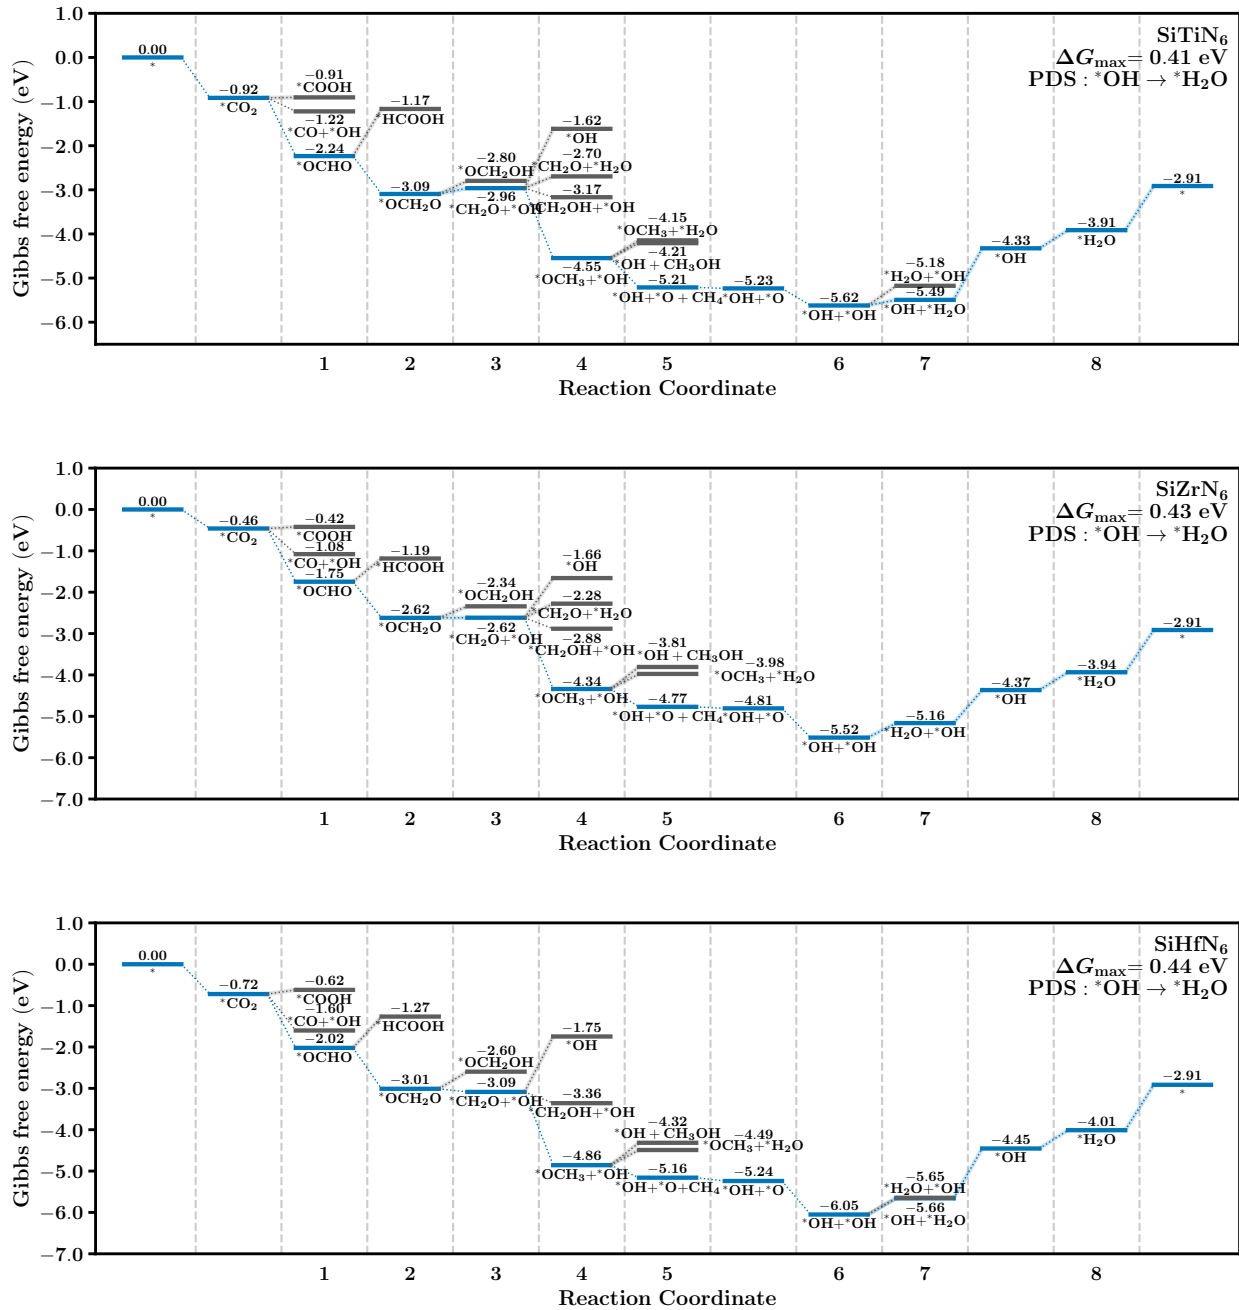

Figure S12: The relative Gibbs free energies in CO<sub>2</sub>RR on SiTiN<sub>6</sub>, SiZrN<sub>6</sub> and SiHfN<sub>6</sub> DACs under the applied potential of 0 V.

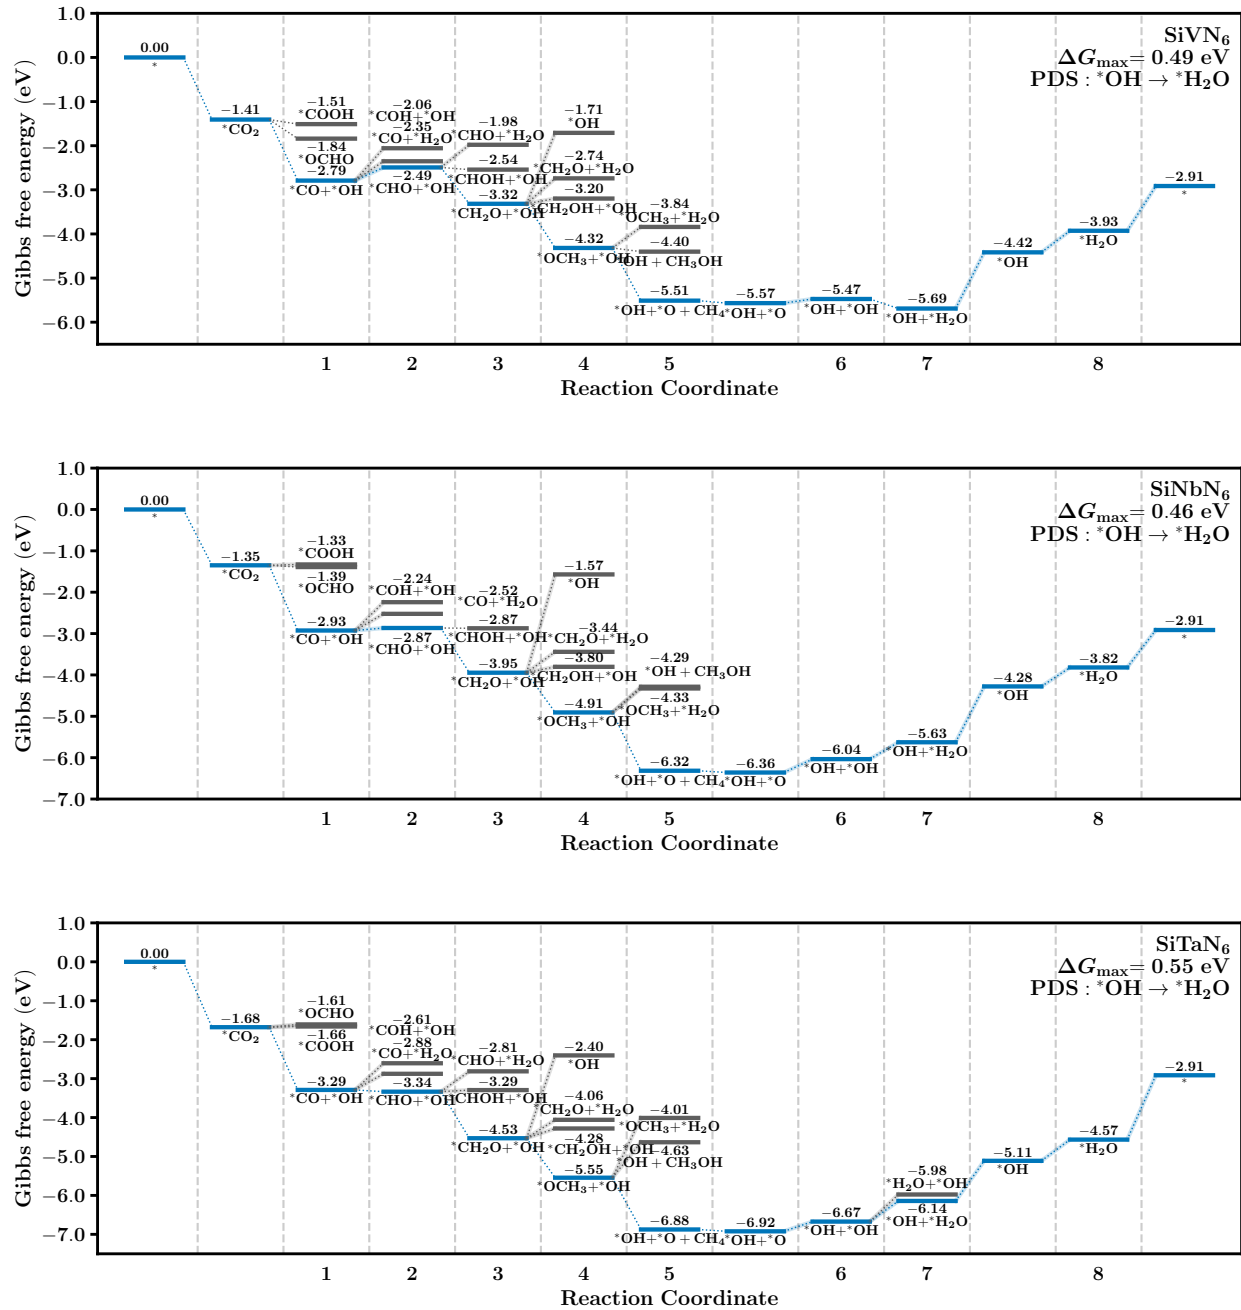

Figure S13: The relative Gibbs free energies in CO<sub>2</sub>RR on SiVN<sub>6</sub>, SiNbN<sub>6</sub> and SiTaN<sub>6</sub> DACs under the applied potential of 0 V.

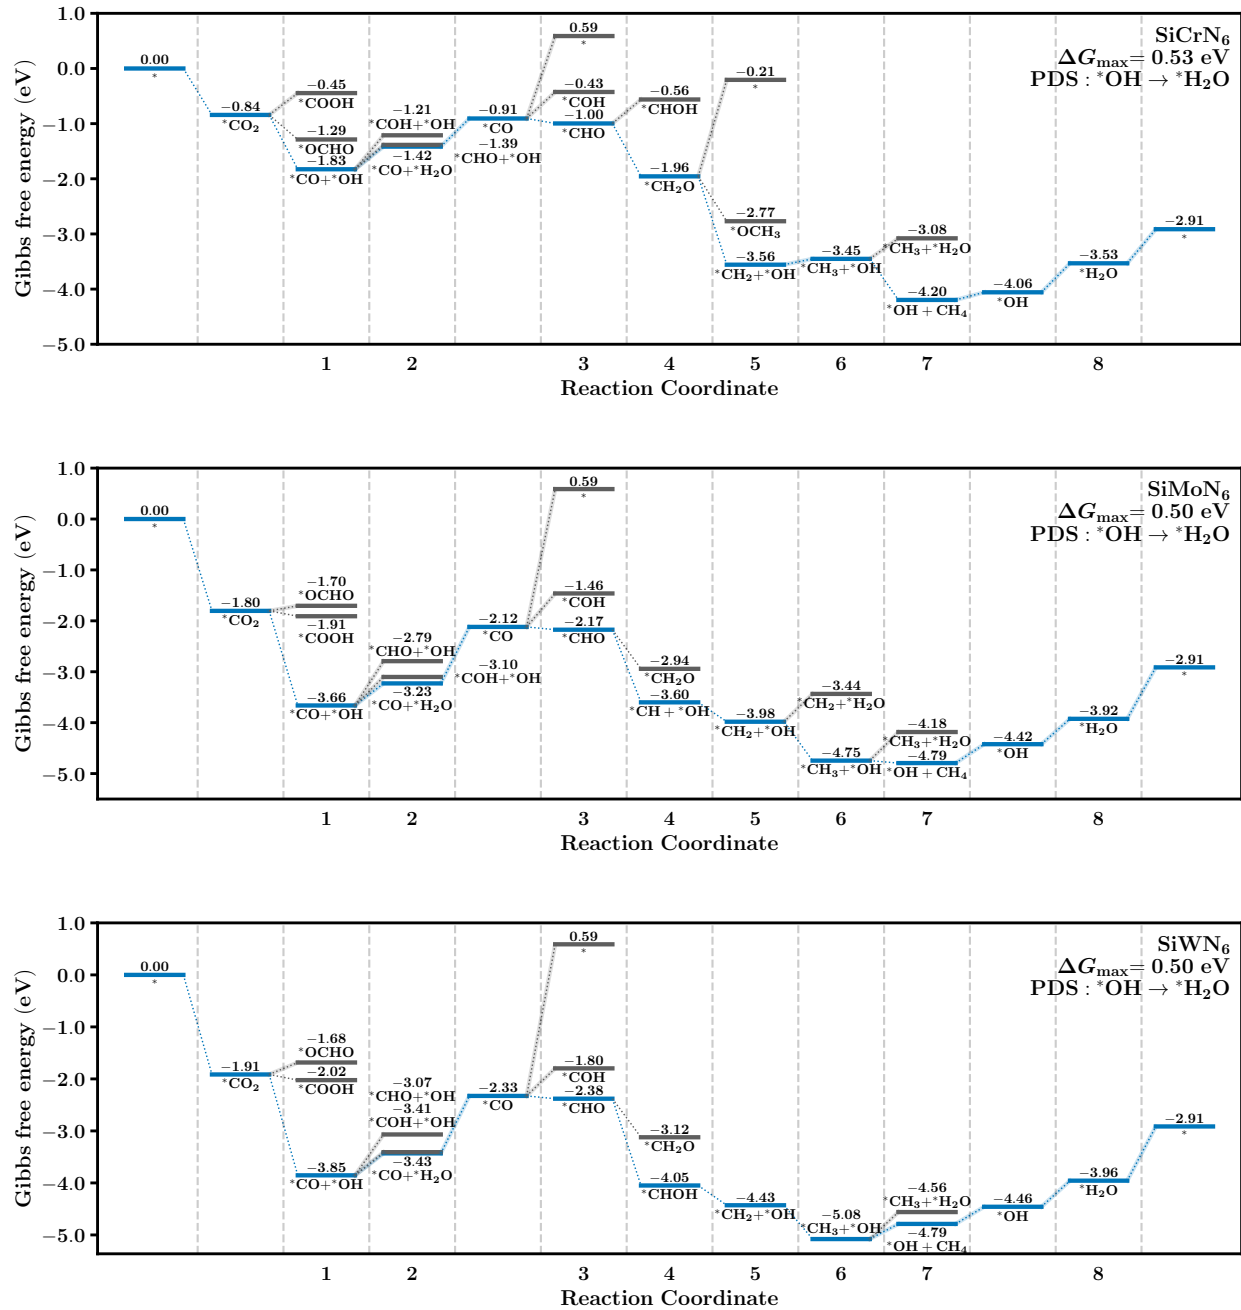

Figure S14: The relative Gibbs free energies in CO<sub>2</sub>RR on SiCrN<sub>6</sub>, SiMoN<sub>6</sub> and SiWN<sub>6</sub> DACs under the applied potential of 0 V.

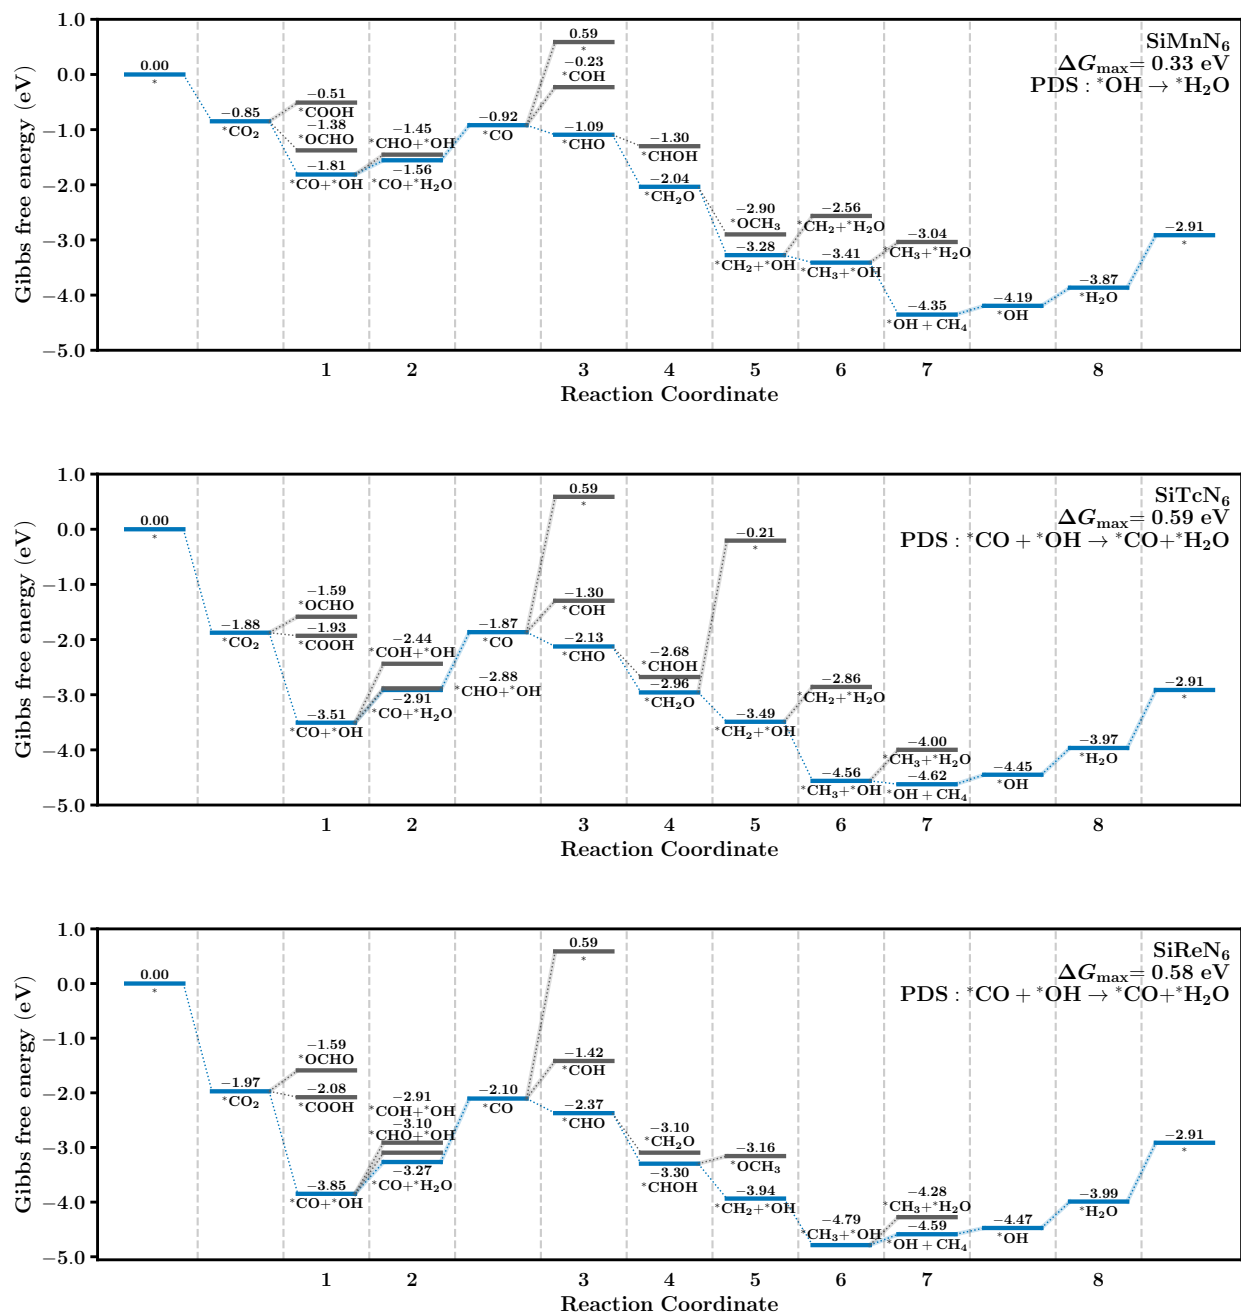

Figure S15: The relative Gibbs free energies in CO<sub>2</sub>RR on SiMnN<sub>6</sub>, SiTcN<sub>6</sub> and SiReN<sub>6</sub> DACs under the applied potential of 0 V.

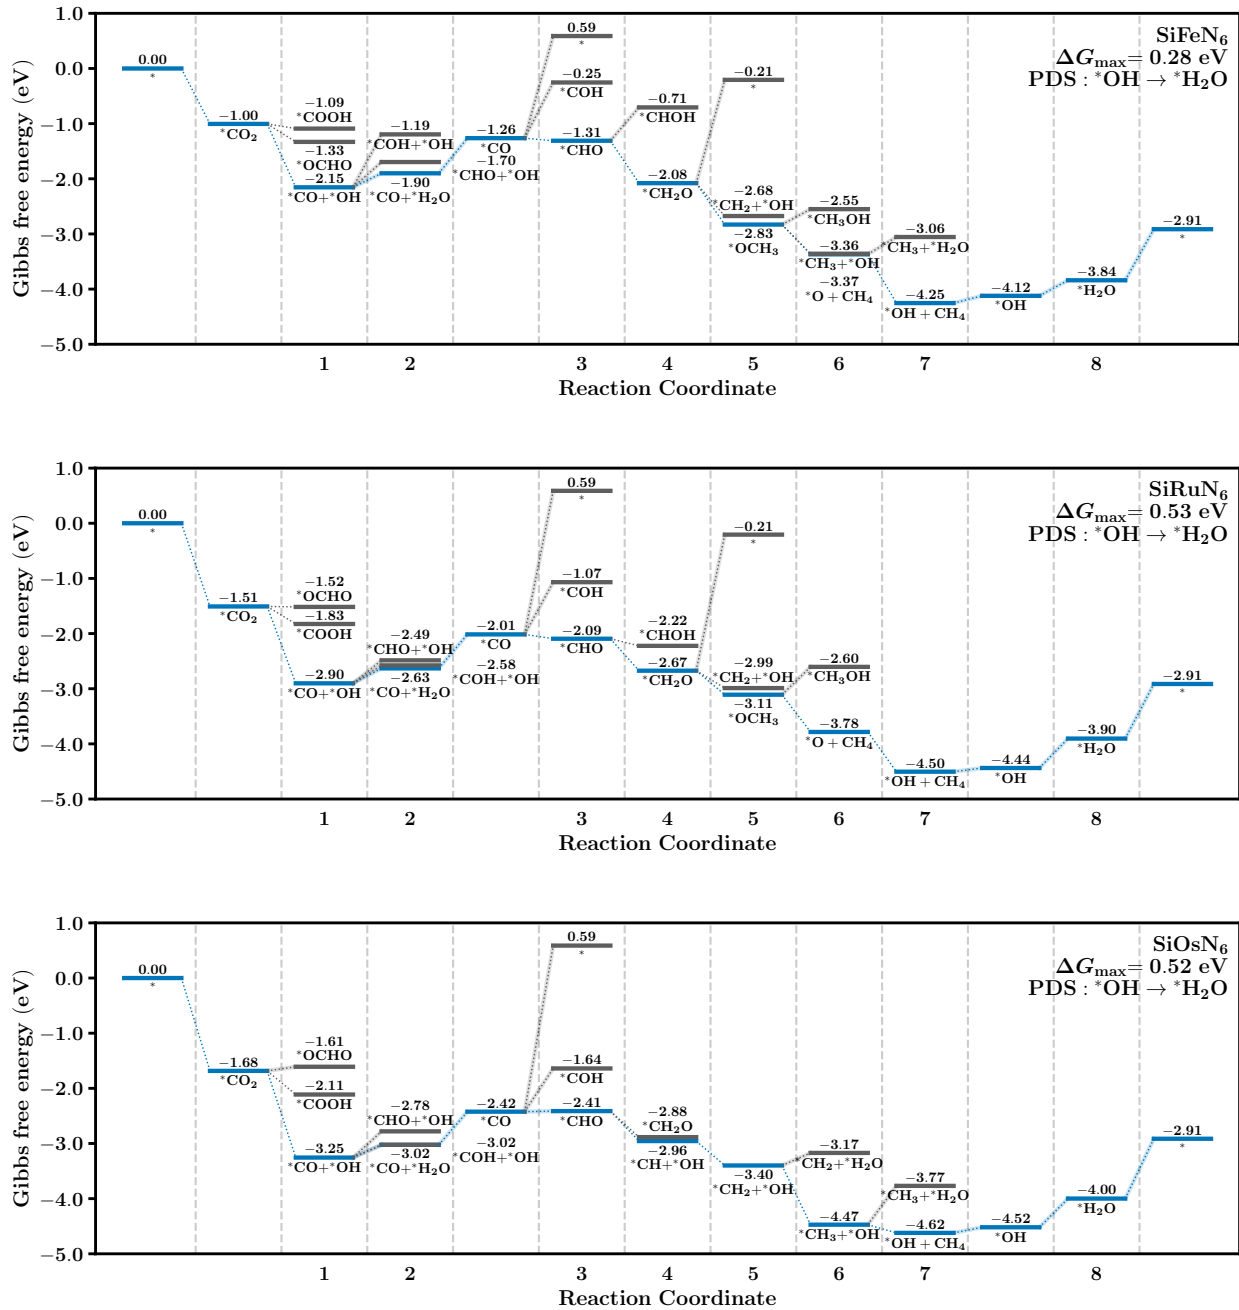

Figure S16: The relative Gibbs free energies in CO<sub>2</sub>RR on SiFeN<sub>6</sub>, SiRuN<sub>6</sub> and SiOsN<sub>6</sub> DACs under the applied potential of 0 V.

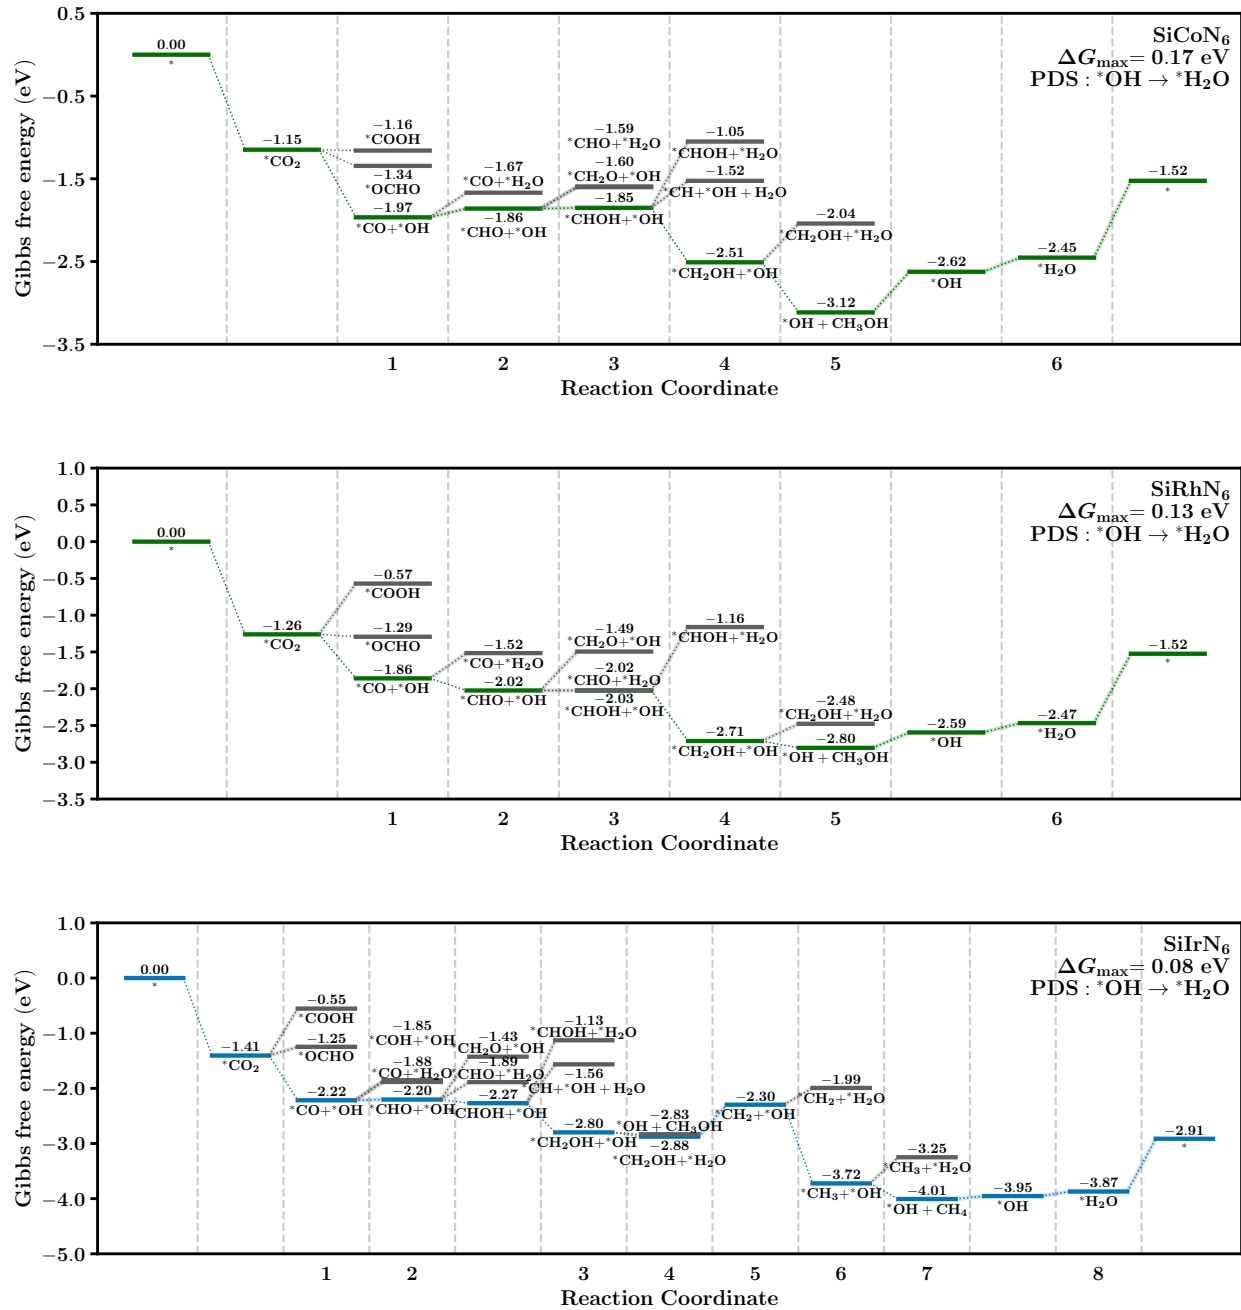

Figure S17: The relative Gibbs free energies in CO<sub>2</sub>RR on SiCoN<sub>6</sub>, SiRhN<sub>6</sub> and SiIrN<sub>6</sub> DACs under the applied potential of 0 V.



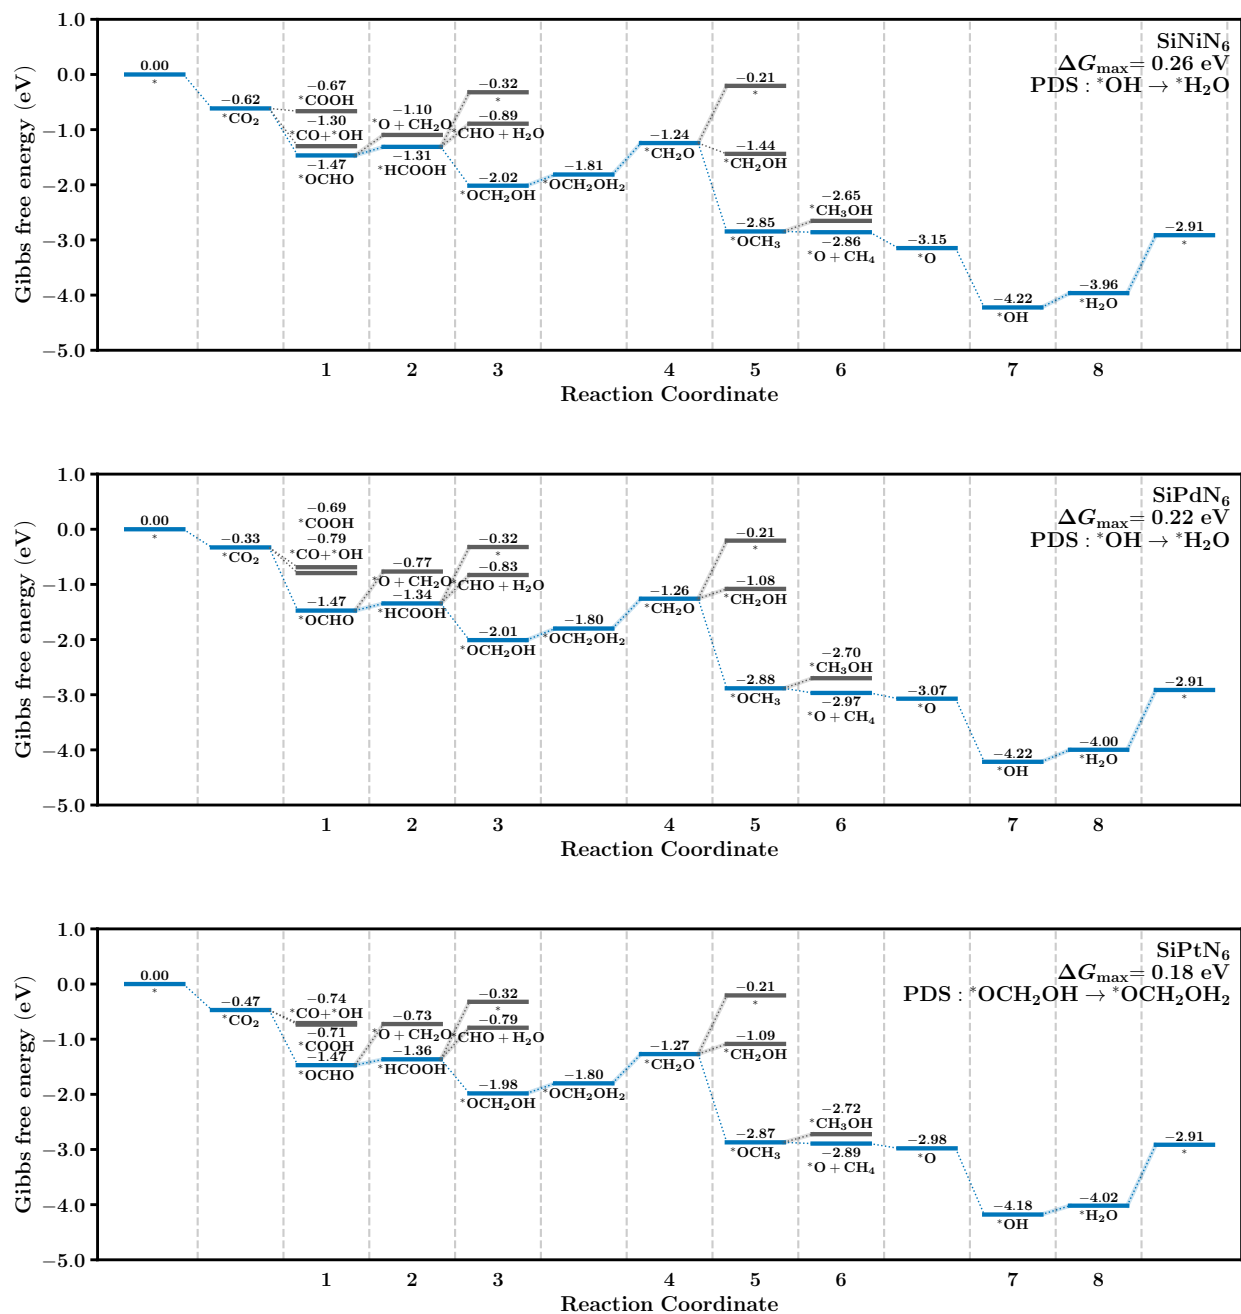

Figure S18: The relative Gibbs free energies in CO<sub>2</sub>RR on SiNiN<sub>6</sub>, SiPdN<sub>6</sub> and SiPtN<sub>6</sub> DACs under the applied potential of 0 V.

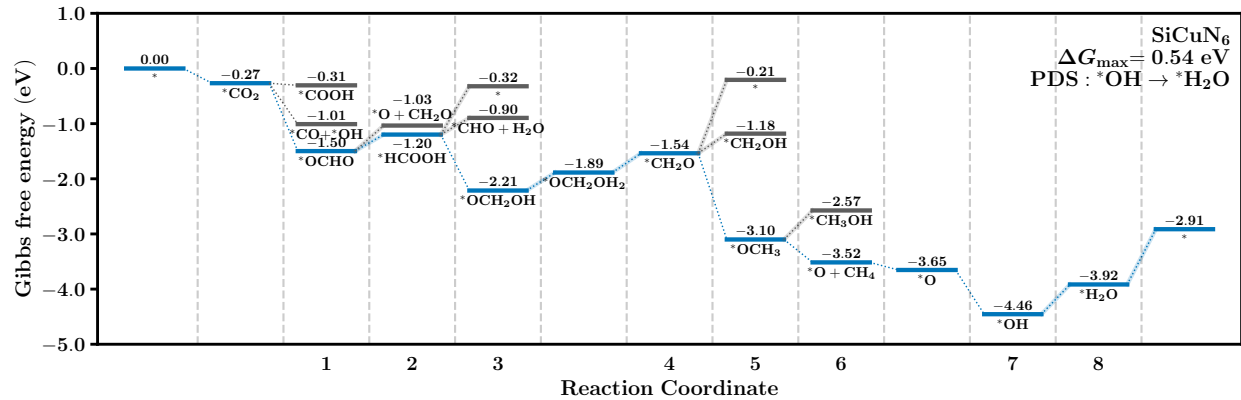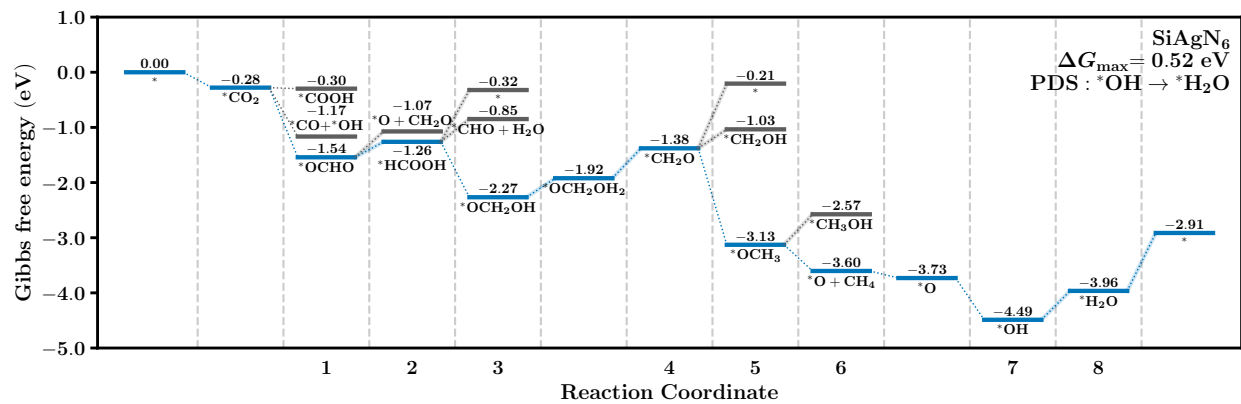

Figure S19: The relative Gibbs free energies in CO<sub>2</sub>RR on SiCuN<sub>6</sub> and SiAgN<sub>6</sub> DACs under the applied potential of 0 V.

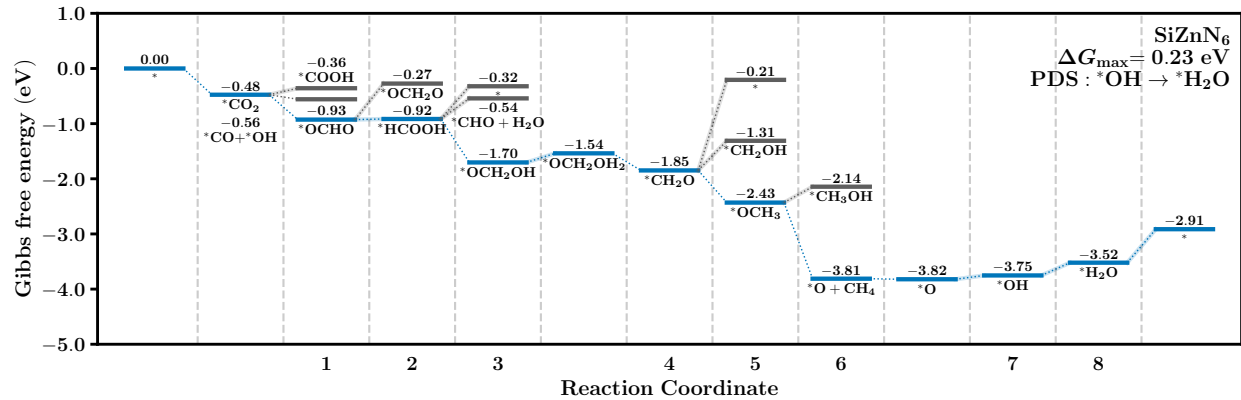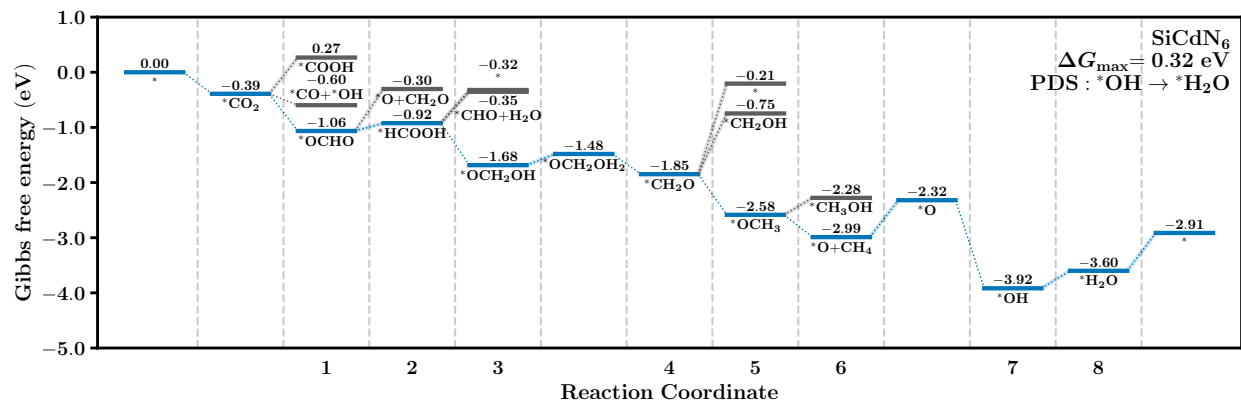

Figure S20: The relative Gibbs free energies in CO<sub>2</sub>RR on SiZnN<sub>6</sub> and SiCdN<sub>6</sub> DACs under the applied potential of 0 V.

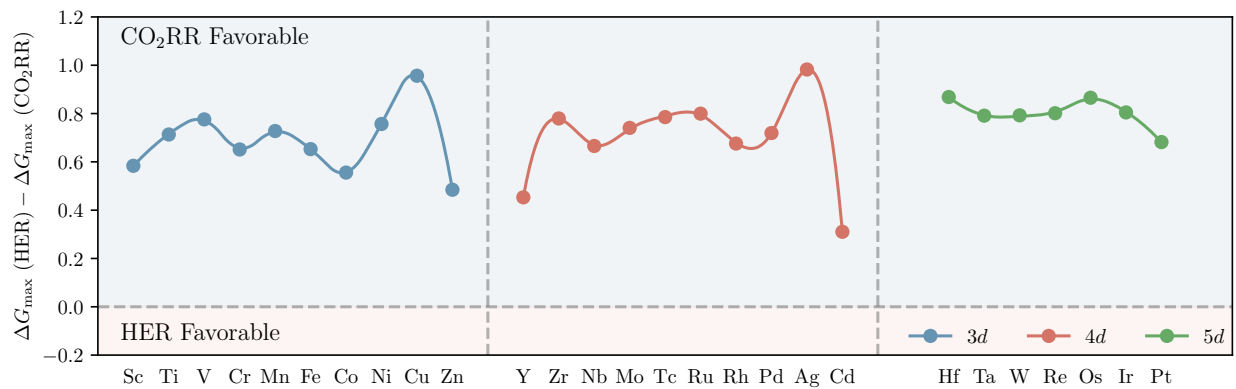

Figure S21: The  $\Delta G_{\max}$  difference between HER with CO<sub>2</sub>RR on different SiTMN<sub>6</sub> DACs.

Table S4: Computed dissolution potential ( $U_{diss}$ ) for selected structures.

| Structure            | $U_{diss}$ |
|----------------------|------------|
| SiCoN <sub>6</sub>   | 0.09       |
| SiRhN <sub>6</sub>   | 0.75       |
| SiIrN <sub>6</sub>   | 1.08       |
| SiCoN <sub>5</sub> B | 0.43       |
| SiCoN <sub>5</sub> C | 0.35       |
| SiRhN <sub>5</sub> B | 1.14       |
| SiRhN <sub>5</sub> C | 1.05       |
| SiIrN <sub>5</sub> B | 1.34       |
| SiIrN <sub>5</sub> C | 1.30       |

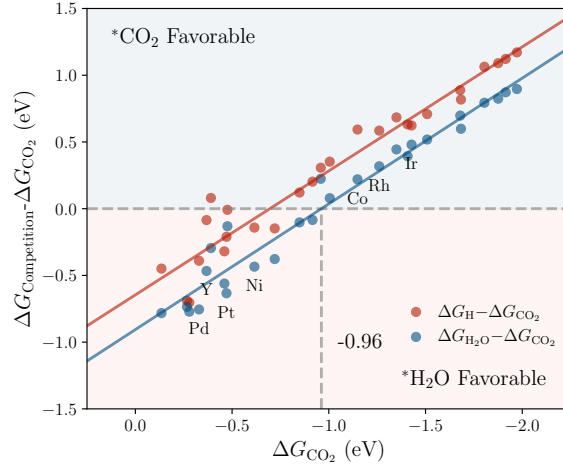

Figure S22: Comparison of the adsorption free energies of \*H, \*H<sub>2</sub>O, and \*CO<sub>2</sub>.

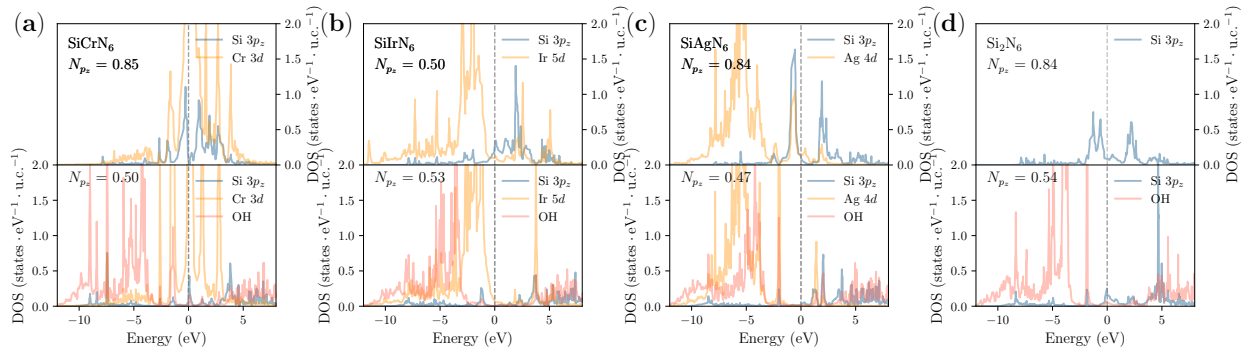

Figure S23: Before and after adsorption, the PDOS for the TM  $d$ , Si  $3p_z$  and CO<sub>2</sub> orbitals of SiCrN<sub>6</sub>, SiIrN<sub>6</sub>, SiAgN<sub>6</sub> and Si<sub>2</sub>N<sub>6</sub> DACs, respectively. The top image represents the state before adsorption, while the bottom image shows the state after adsorption.

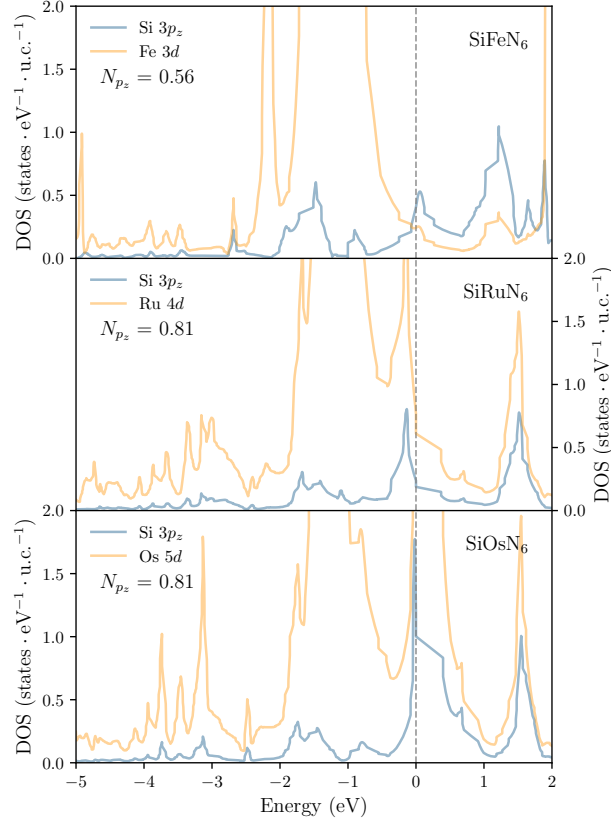

Figure S24: The PDOS for the TM  $d$  and Si  $3p_z$  on SiFeN<sub>6</sub>, SiRuN<sub>6</sub> and SiOsN<sub>6</sub> DACs, respectively.

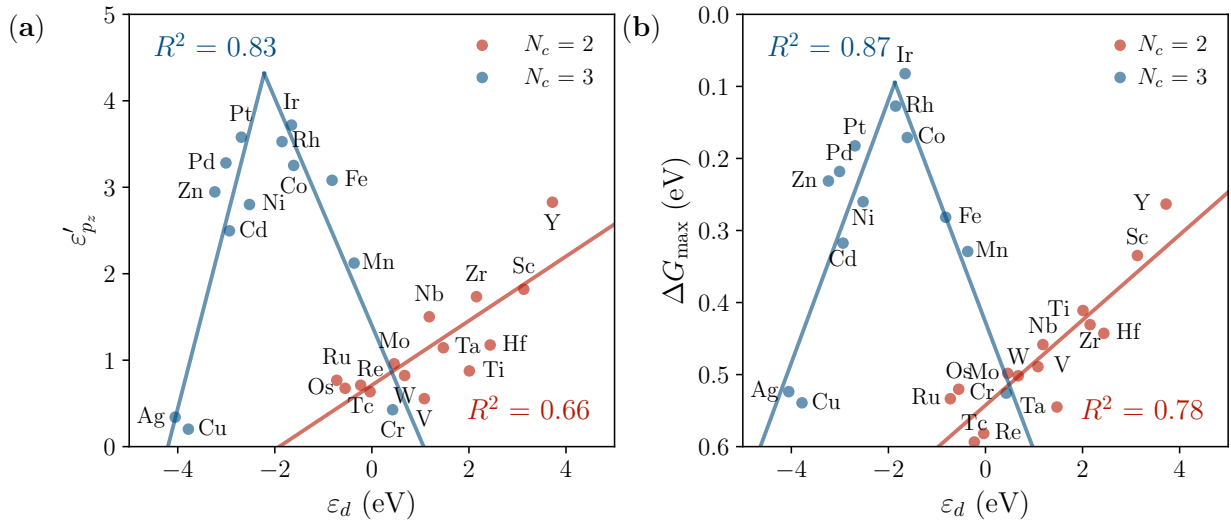

Figure S25: (a) Correlations between  $\varepsilon_d$  and  $\varepsilon'_{p_z}$  for different SiTMN<sub>6</sub> DACs; (b) Correlations between  $\varepsilon_d$  and  $\Delta G_{\max}$  for different SiTMN<sub>6</sub> DACs.

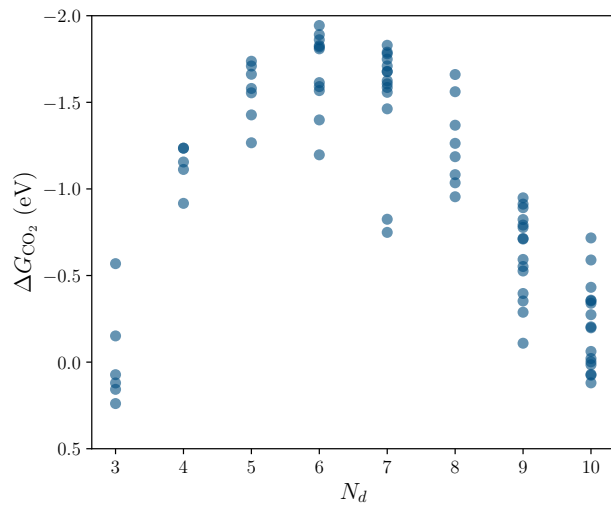

Figure S26: Distribution of  $\Delta G_{\text{CO}_2}^*$  in the training data set as functions of feature of  $N_d$ .

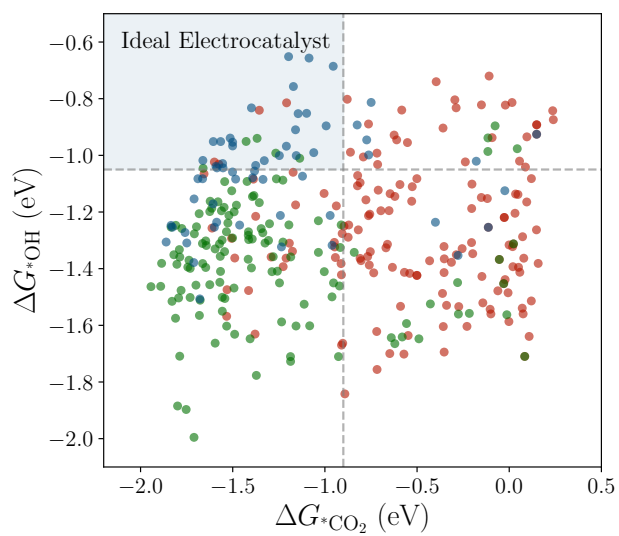

Figure S27:  $\Delta G_{\text{CO}_2}^*$  and  $\Delta G_{\text{OH}}^*$  for different  $\text{SiTMN}_5\text{An}$ .

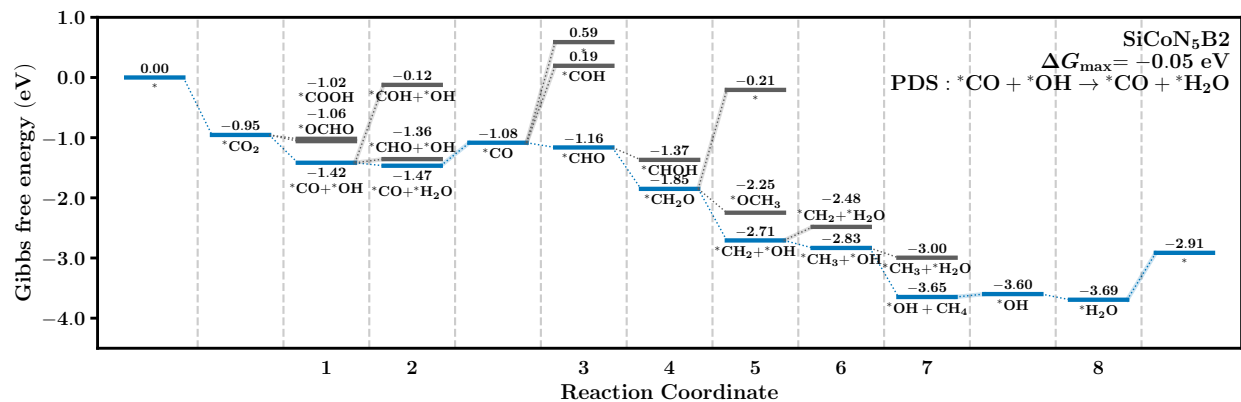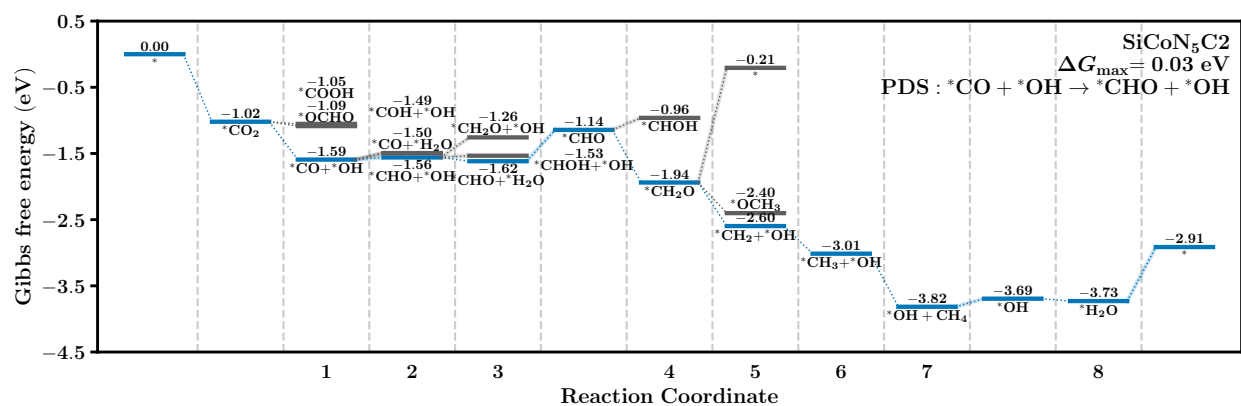

Figure S28: The relative Gibbs free energies in CO<sub>2</sub>RR on SiCoN<sub>5</sub>B2 and SiCoN<sub>5</sub>C2 DACs under the applied potential of 0 V.

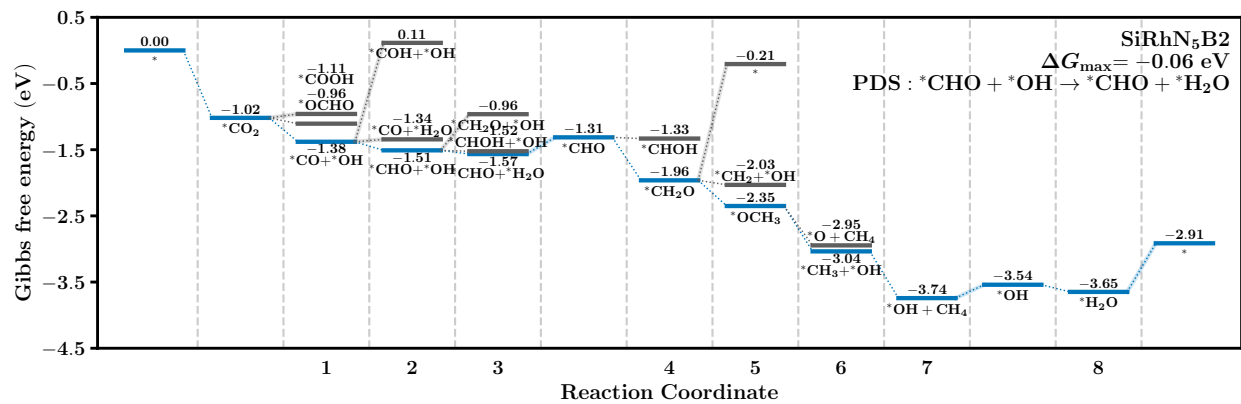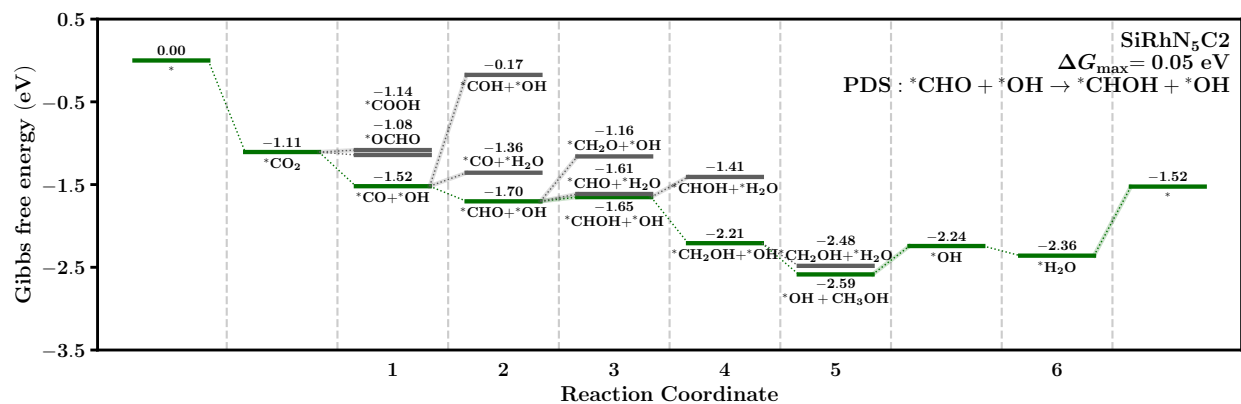

Figure S29: The relative Gibbs free energies in CO<sub>2</sub>RR on SiRhN<sub>5</sub>B2 and SiRhN<sub>5</sub>C2 DACs under the applied potential of 0 V.



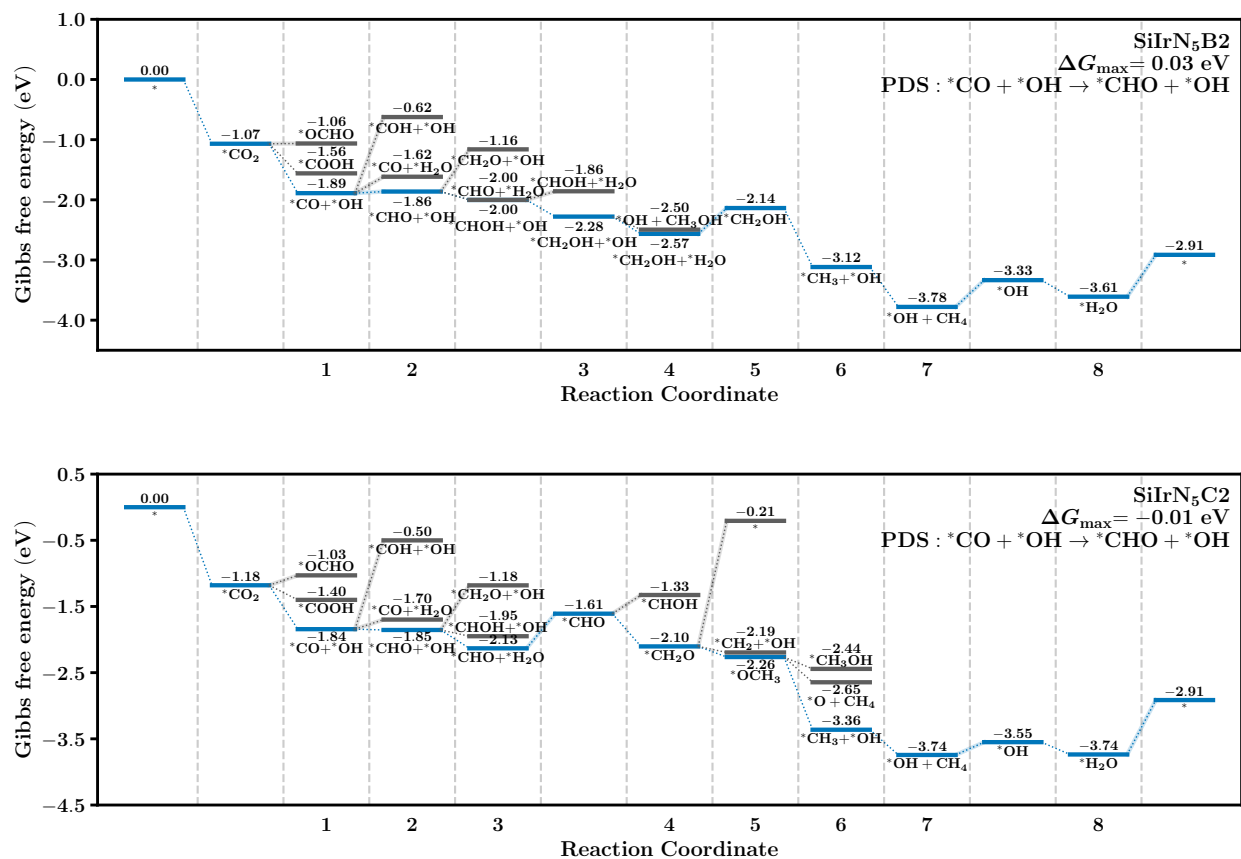

Figure S30: The relative Gibbs free energies in  $\text{CO}_2\text{RR}$  on  $\text{SiIrN}_5\text{B2}$  and  $\text{SiIrN}_5\text{C2}$  DACs under the applied potential of 0 V.

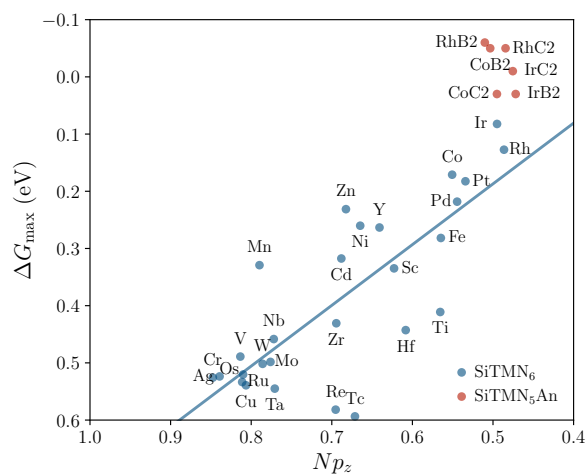

Figure S31: Correlations between  $N_{p_z}$  and  $\Delta G_{\text{max}}$  of  $\text{SiTMN}_6$  DACs and screened  $\text{SiTMN}_5\text{An}$  DACs.

Table S5: Screening Results of Dopant Candidates Identified after Considering the  $\Delta G^*_{\text{CO}_2}$  and  $\Delta G^*_{\text{OH}}$ .

| Number | Structure | $\Delta G_{\text{OH} \rightarrow \text{H}_2\text{O}}$ | Number | Structure | $\Delta G_{\text{OH} \rightarrow \text{H}_2\text{O}}$ |
|--------|-----------|-------------------------------------------------------|--------|-----------|-------------------------------------------------------|
| 01     | IrB2      | -0.27                                                 | 18     | VB2       | 0.11                                                  |
| 02     | IrC2      | -0.19                                                 | 19     | TcB2      | 0.11                                                  |
| 03     | RhC2      | -0.12                                                 | 20     | MnC2      | 0.12                                                  |
| 04     | RhB2      | -0.11                                                 | 21     | RuB2      | 0.13                                                  |
| 05     | CoB2      | -0.09                                                 | 22     | CrB2      | 0.13                                                  |
| 06     | CoC2      | -0.04                                                 | 23     | NbB2      | 0.16                                                  |
| 07     | IrC4      | 0.00                                                  | 24     | MoC2      | 0.17                                                  |
| 08     | IrC1      | 0.01                                                  | 25     | WC2       | 0.21                                                  |
| 09     | MoC1      | 0.02                                                  | 26     | IrB1      | 0.21                                                  |
| 10     | RhC6      | 0.03                                                  | 27     | RuC2      | 0.22                                                  |
| 11     | IrC6      | 0.06                                                  | 28     | VC2       | 0.22                                                  |
| 12     | MoB2      | 0.06                                                  | 29     | CrC2      | 0.24                                                  |
| 13     | MnB2      | 0.07                                                  | 30     | MoC3      | 0.26                                                  |
| 14     | ReB2      | 0.07                                                  | 31     | CoC5      | 0.26                                                  |
| 15     | OsB2      | 0.08                                                  | 32     | IrC5      | 0.26                                                  |
| 16     | RhC1      | 0.09                                                  | 33     | CrC1      | 0.32                                                  |
| 17     | WB2       | 0.10                                                  |        |           |                                                       |

## References

- (1) Pedregosa, F. et al. Scikit-learn: Machine Learning in Python. *Journal of Machine Learning Research* **2011**, *12*, 2825–2830.
